# Supplementary material for: Humoral and cellular immune response in Wistar Han RCC rats fed two genetically modified maize MON810 varieties for 90 days (EU 7th Framework Programme project GRACE)
Source: PubMed Central journal article supplement (PMC6015625; doi:10.1007/s00204-018-2230-z), 2018-05-31

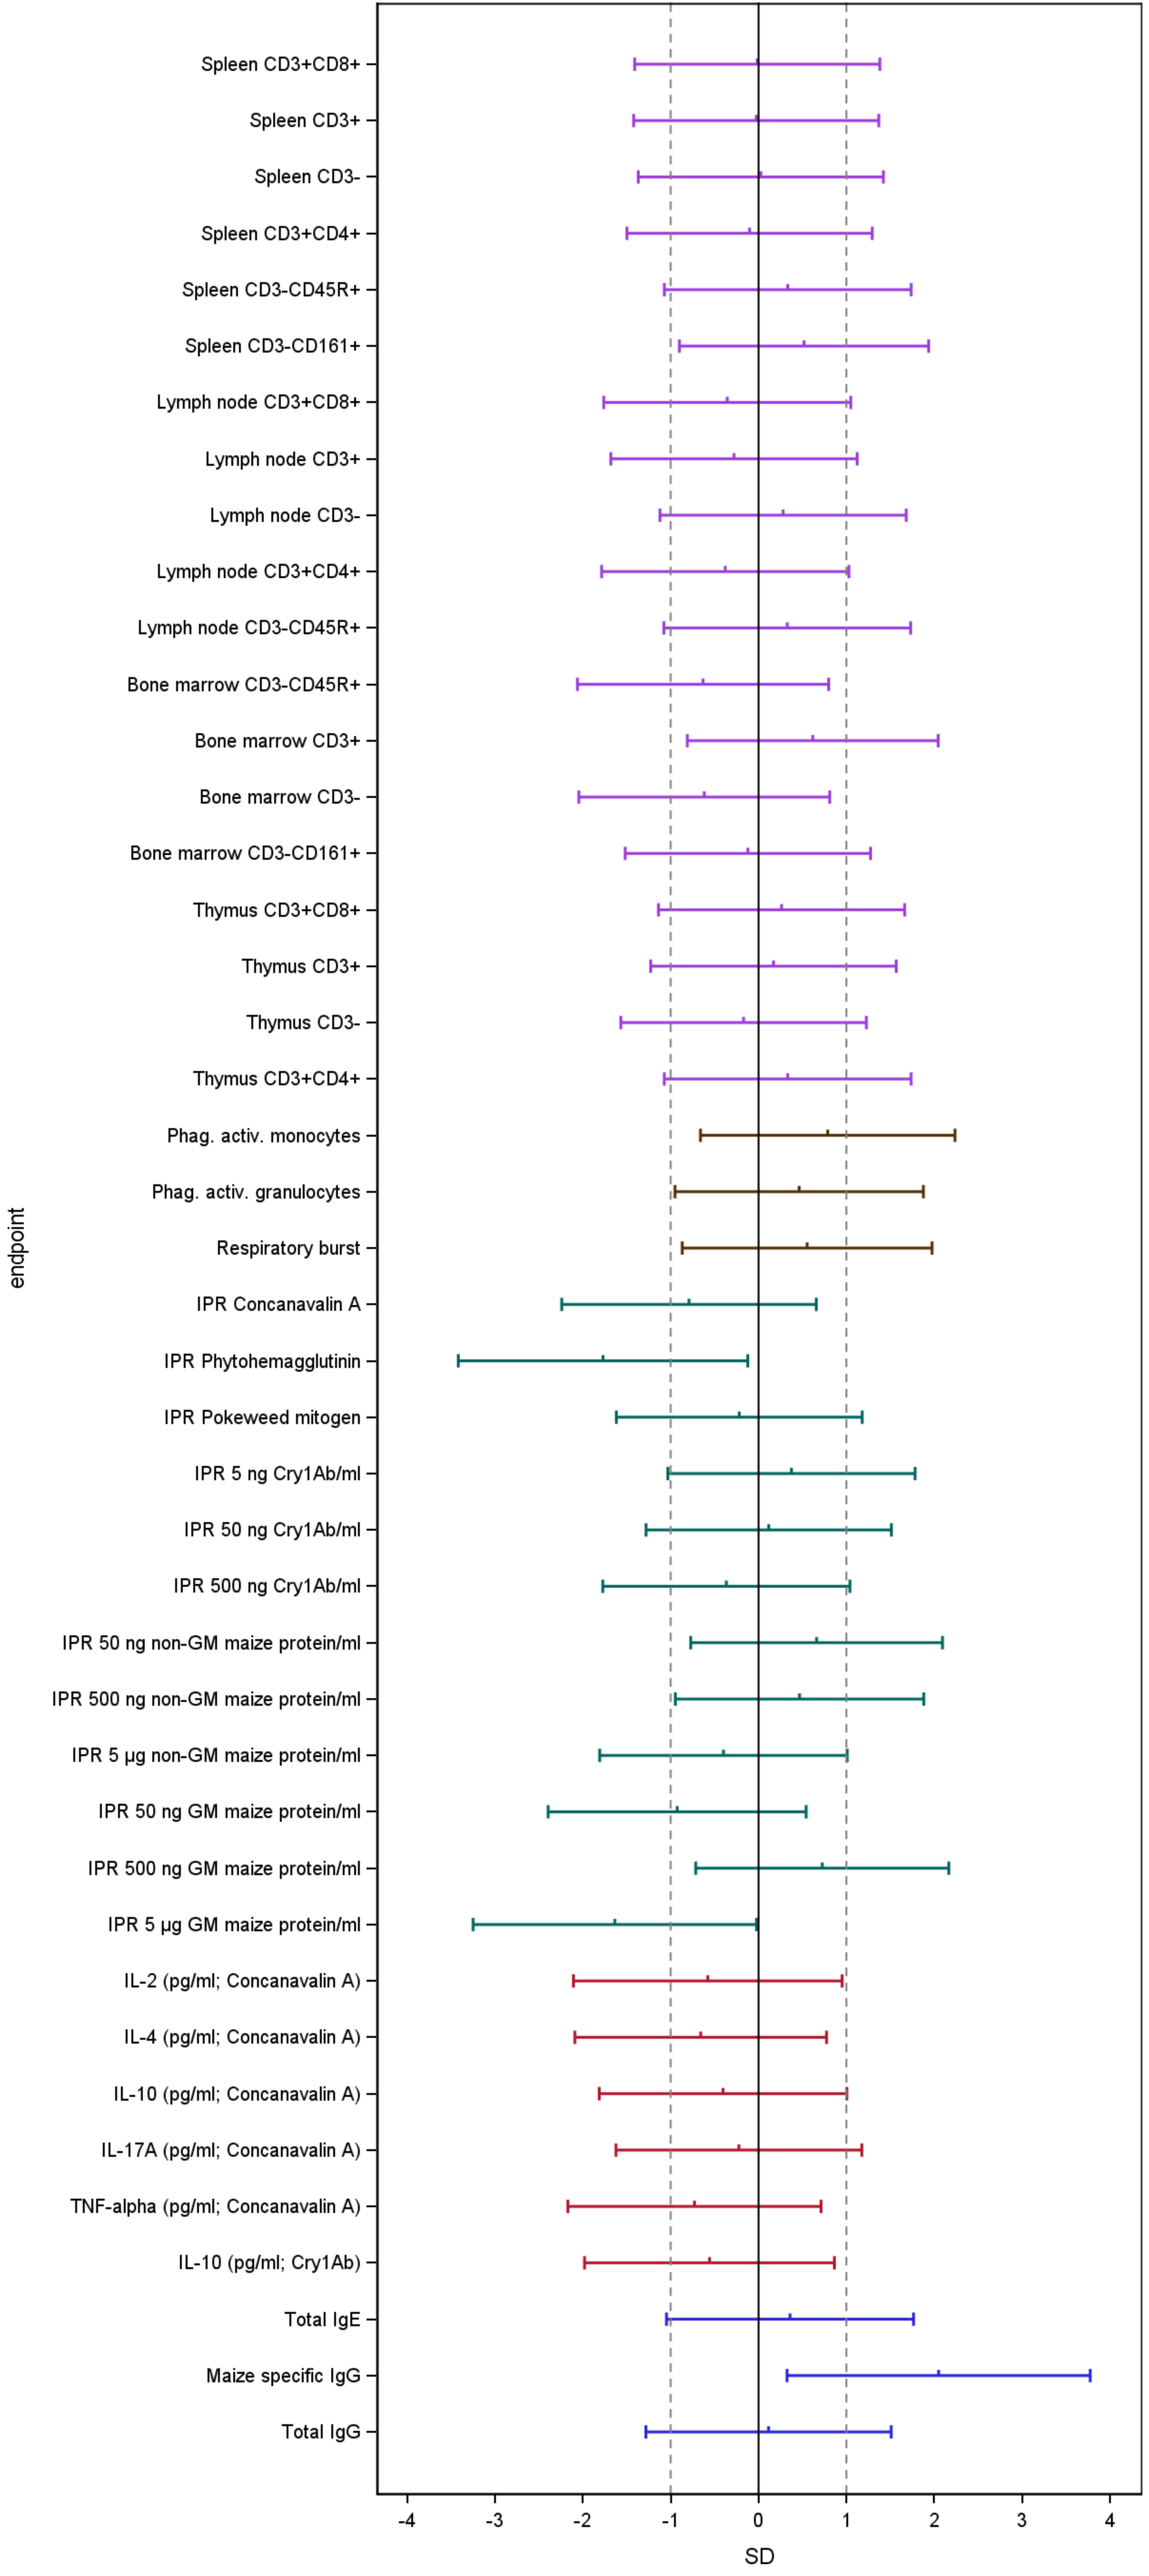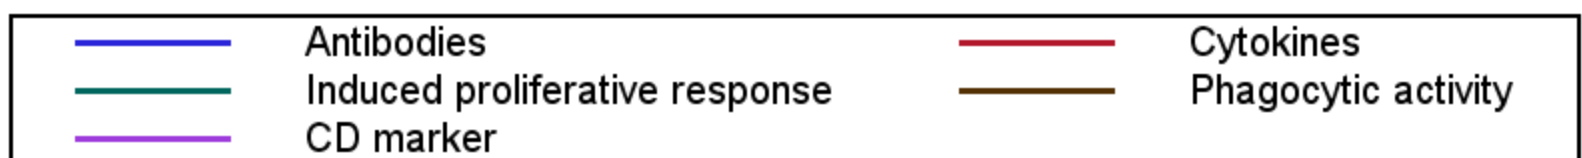

Supplement: 204_2018_2230_MOESM8_ESM.pdf [file 204_2018_2230_MOESM8_ESM.pdf]
